# Supplementary material for: Cyclin A triggers Mitosis either via the Greatwall kinase pathway or Cyclin B
Source: EMBO J. 2020 Apr 30;39(11):e104419. doi: 10.15252/embj.2020104419 (PMC7265243; doi:10.15252/embj.2020104419)
Supplement: Supplementary file 2 — Expanded View Figures PDF [file EMBJ-39-e104419-s002.pdf]

## Expanded View Figures

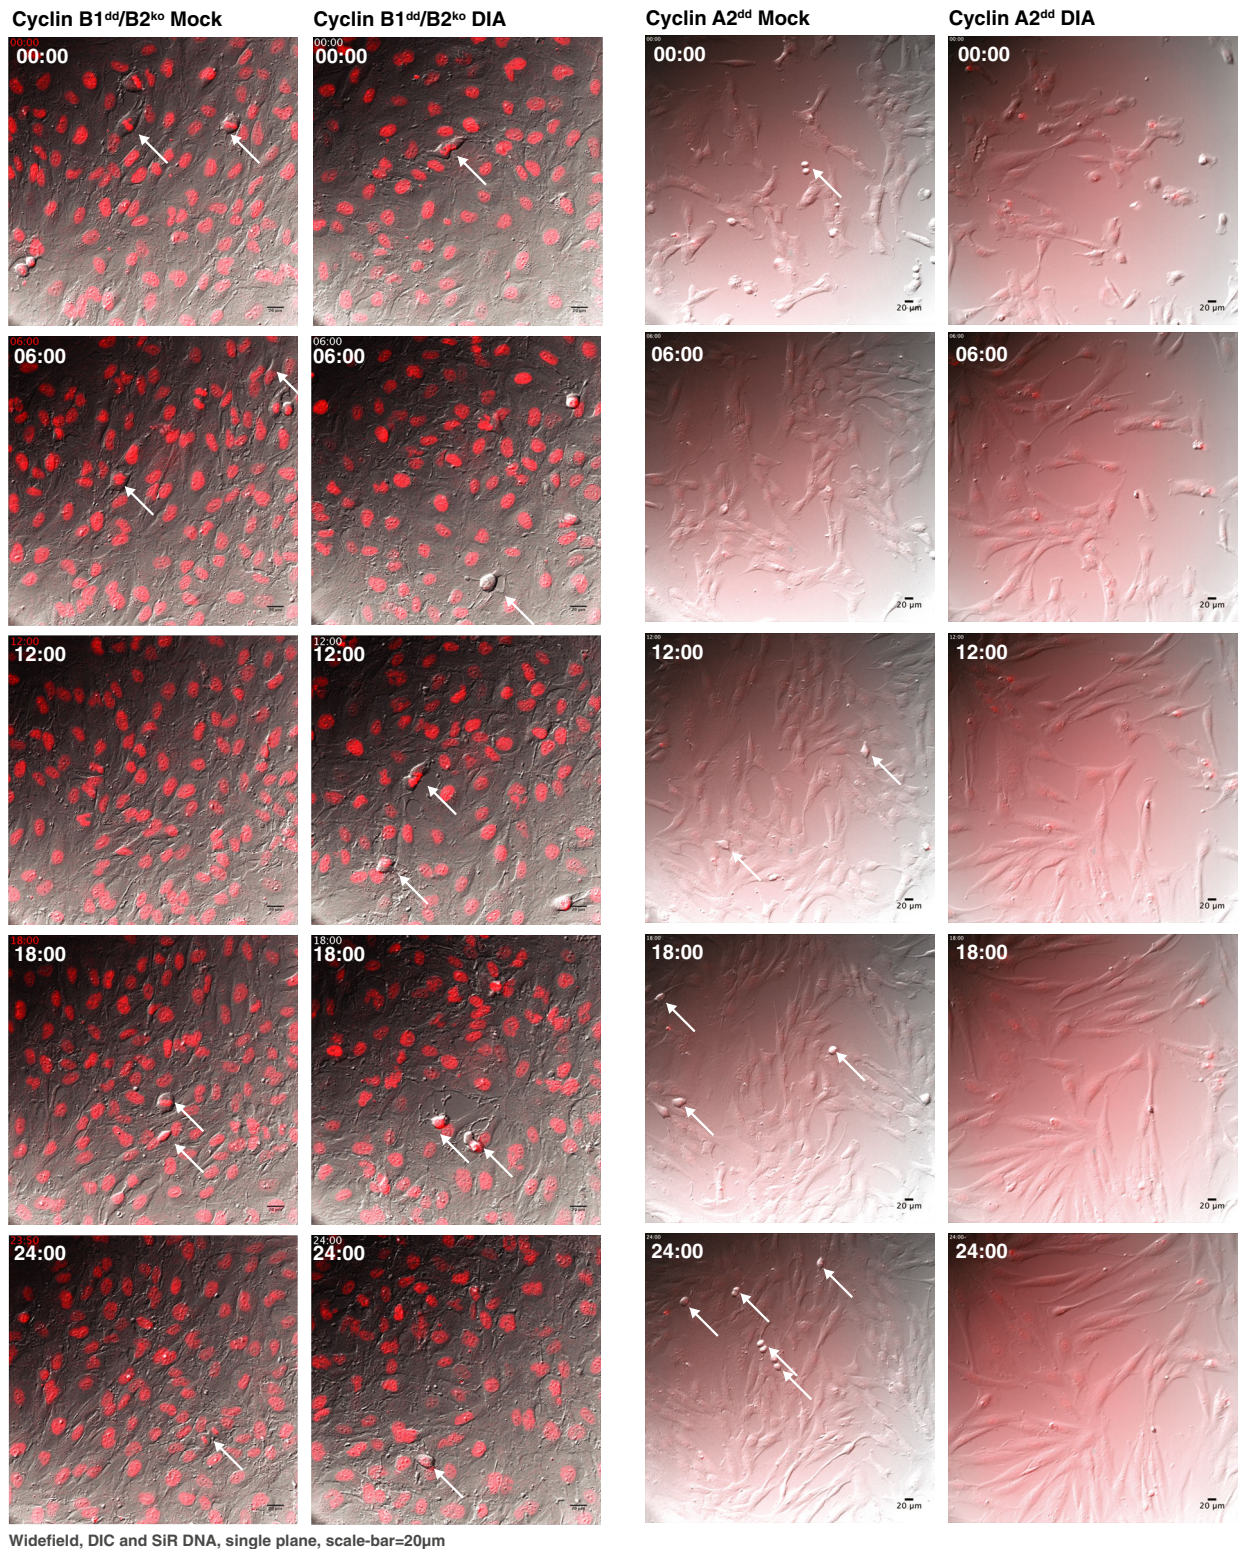

Figure EV1. Mitotic progression in RPE-1 cells lacking cyclins B1 and B2.

Differential interference contrast (DIC) and fluorescence widefield video microscopy of mock or DIA-treated SiR-DNA-labelled cells with indicated genotypes. Images show a progression of 6 h time points (time indicated as hh:min, scale bar indicates 20  $\mu$ m, and arrows point to dividing cells).

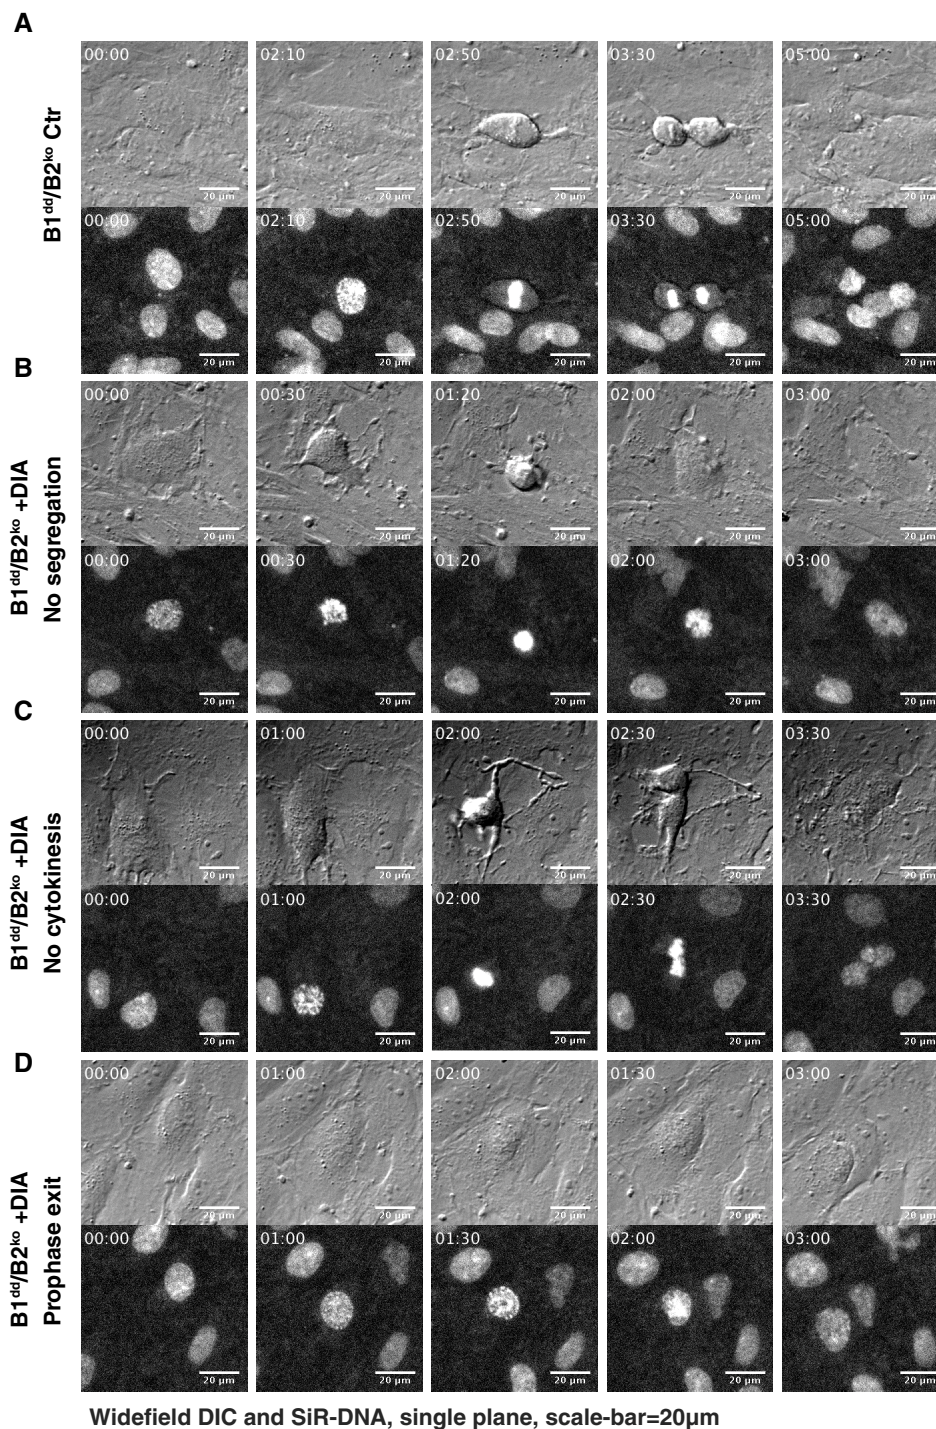

**Figure EV2. Mitotic phenotypes of DIA-treated B1dd/B2ko cells.**

Stills from live-cell imaging of asynchronously dividing B1<sup>dd</sup>/B2<sup>ko</sup> cells (DIC (top) and SiR-DNA (bottom), time is indicated as hh:min, and scale bar indicates 20  $\mu$ m).

A A successful cell division in untreated B1<sup>dd</sup>/B2<sup>ko</sup> cells.

- B DIA-treated  $B1^{dd}/B2^{ko}$  cells that fail to segregate sister chromatids and initiate cell division.  
 C DIA-treated  $B1^{dd}/B2^{ko}$  cells that attempt segregation and cytokinesis but fail to separate resulting in binuclear cells.  
 D DIA-treated  $B1^{dd}/B2^{ko}$  cells that fail to undergo NEBD and exit mitosis from prophase. All cells were imaged four to 6 h after DIA treatment.

### $B1^{dd}/B2^{ko}$ cells Mitosis

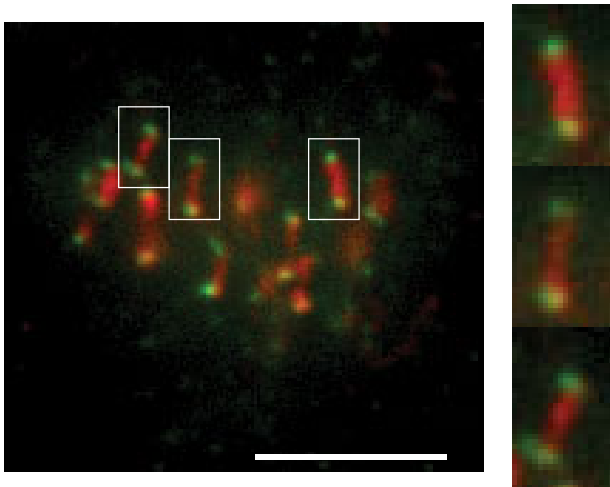

### $B1^{dd}/B2^{ko}$ cells +DIA Mitosis

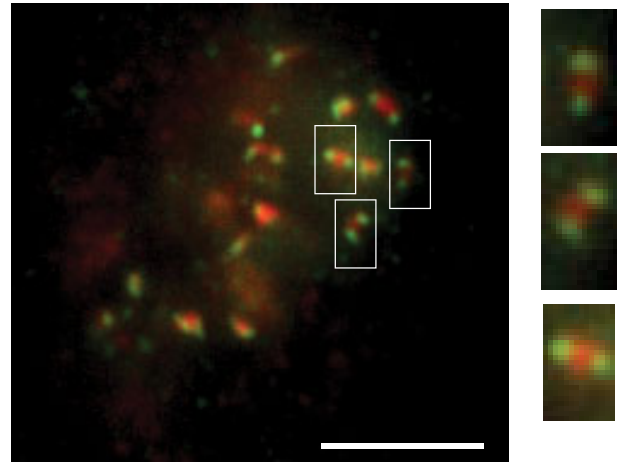

### $B1^{dd}/B2^{ko}$ cells Exit

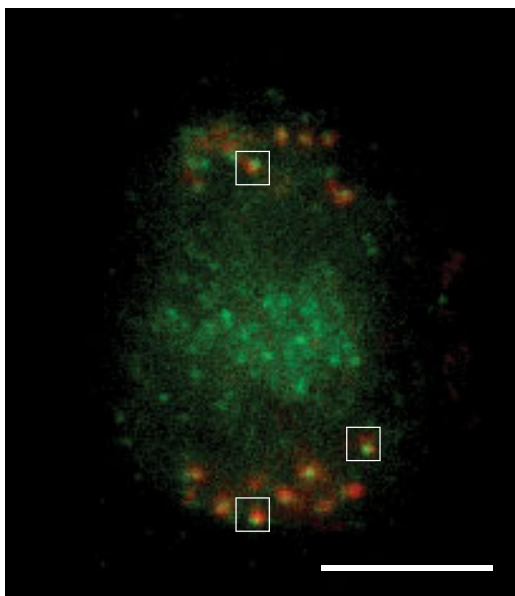

### $B1^{dd}/B2^{ko}$ cells +DIA Exit

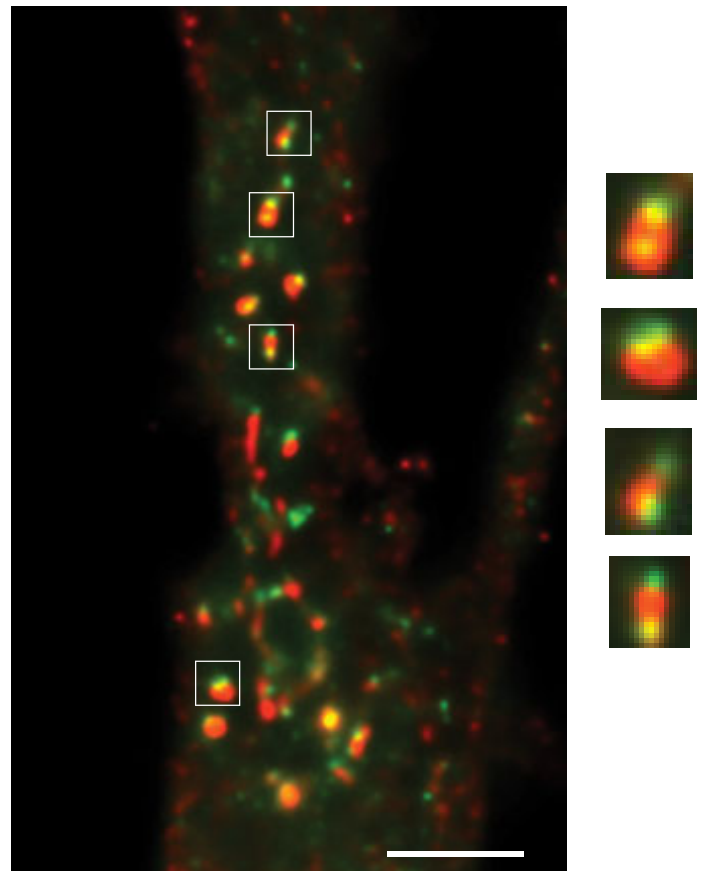

Widefield deconvolved single plane images,  
scale-bar 5  $\mu$ m

**Figure EV3. Analysis of Kinetochore tension and segregation.**

Immunofluorescence images from mitotic (mitosis, top two panels) and ana/telophase (Exit, bottom two panels) Ctr- and DIA-treated B1<sup>dd</sup>/B2<sup>ko</sup> cells stained with anti-CenpA (green) and anti-CenpB (red) antibodies. For DIA-treated cells, we determined the exit state by the onset of a cytokinesis furrow, since sister-chromatid segregation did not occur. Areas marked by squares are enlarged twofold at the right of each panel. The scale bar represents 5  $\mu$ m.

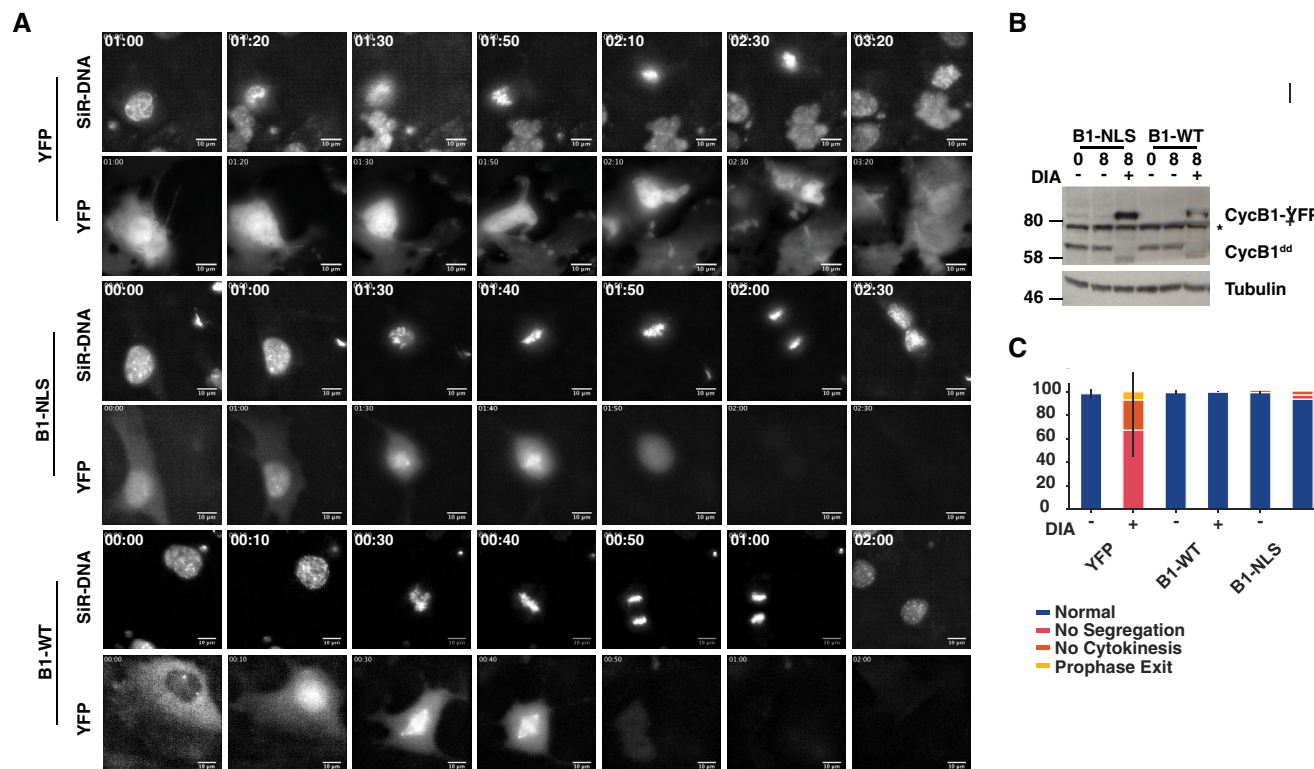**Figure EV4. Rescue of cyclin B phenotypes by induced expression of cyclin B.**

- A B1<sup>dd</sup>/B2<sup>ko</sup> cells containing indicated inducible constructs were released from a single Thymidine arrest and treated with DIA to deplete endogenous cyclin B1 and induce expression of YFP, CycB1-YFP (B1-WT) or CycB1-YFP-NLS (B1-NLS). Imaging (SiR-DNA and YFP) was initiated 10 h after the release. The images displayed are from the time-lapse sequence at the indicated time points in hh:min. The scale bar represents a length of 10  $\mu$ m.
- B B1-WT- and B1-NLS-inducible cell lines were analysed for DIA-induced cyclin B1 induction/depletion. Samples were collected at indicated time points and probed by immunoblotting with cyclin B1 and  $\alpha$ -tubulin antibodies (\* indicates non-specific band).
- C Quantification of the DIA-induced cell division phenotypes following induction of YFP, CycB1-YFP and CycB1-YFP-NLS induction. Data were collected from three independent experiments ( $n = 50$ ), and the error bars indicate standard deviation between the three data sets.

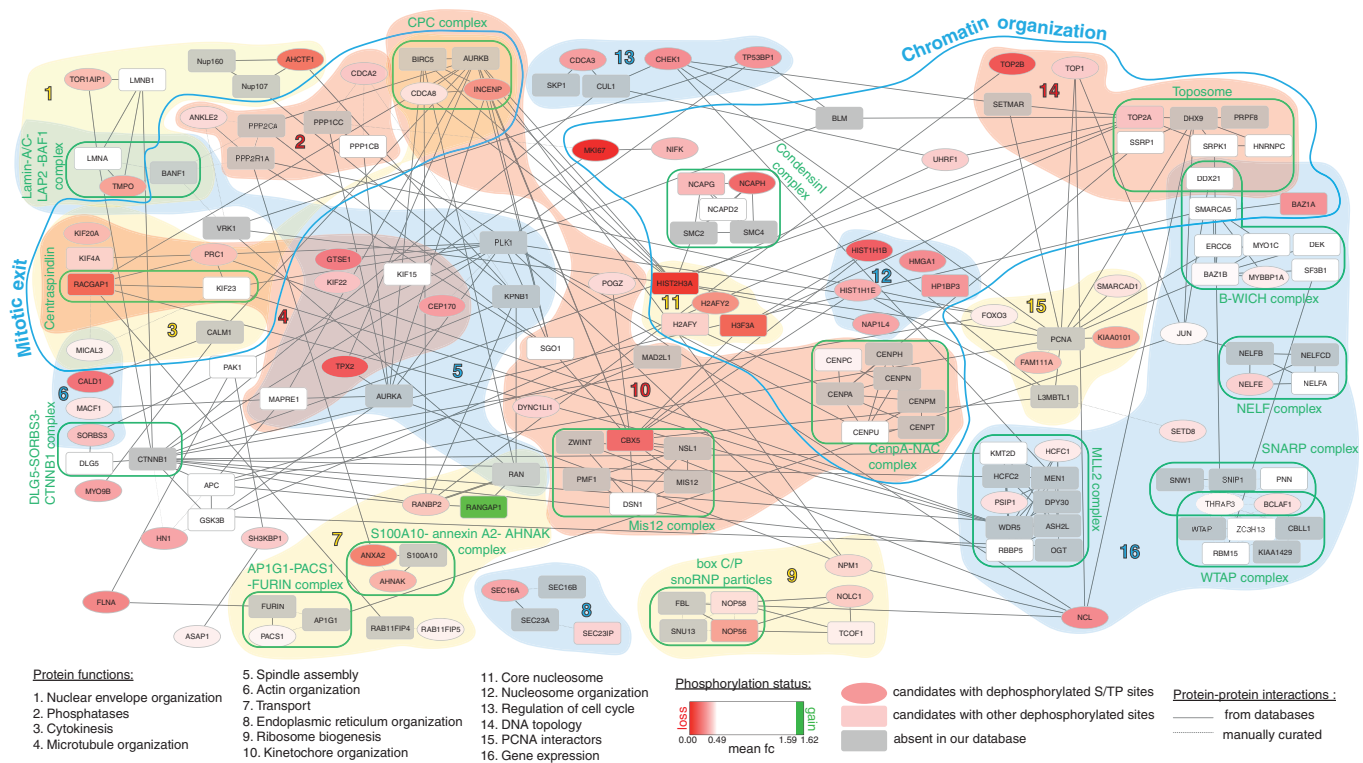

**Figure EV5. Network analysis of identified cyclin B substrates.**

Candidates with increased phosphorylation following cyclin B depletion are shown in green and candidates with decreased phosphorylation in red. Grey signifies proteins that are in a known complex, but absent from our data. S/T/P sites are shown as ellipses.
